# Supplementary material for: D-Light on promoters: a client-server system for the analysis and visualization of cis-regulatory elements
Source: PubMed Central journal article supplement (PMC3685601; doi:10.1186/1471-2105-14-140), 2013-04-24
Supplement: 1471-2105-14-140-S2.pdf [file 1471-2105-14-140-S2.pdf]

## TFM-Explorer

*URL:*

<http://bioinfo.lifl.fr/TFM/TFME/>

*Description from the web page:*

TFM-Explorer (Transcription Factor Matrix Explorer) is a program for analysing regulatory regions of eukaryotic genomes. It takes a set of coregulated gene sequences, and searches for locally overrepresented transcription factor binding sites.

## rVista

*URL:*

<http://genome.lbl.gov/vista/rvista/submit.shtml>

*Description from the web page:*

Locates regulatory sequences in the user supplied data using comparative sequence analysis and transcription factor binding site search.

*Remarks:*

The rVista software is included in the “Vista Tools for Comparative Genomics” at <http://genome.lbl.gov/vista/index.shtml>.

A similar tool is rVista 2.0 at <http://rvista.dcode.org/>. In the operating mode comparable to rVista, only two sequences can be supplied.

## CONREAL

*URL:*

<http://conreal.niob.knaw.nl/>

*Description from the web page:*

Identifies and visualizes conserved transcription factor bindings sites in orthologous promoters.

*Remarks:*

The upload is limited to two sequences. When a results page is saved as text, extracting the table requires some effort.

## **MAPPER2**

*URL:*

<http://genome.ufl.edu/mapper/>

*Description from the web page:*

MAPPER is a platform for the computational identification of transcription factor binding sites (TFBSs) in multiple genomes, that combines TRANSFAC and JASPAR data with the search power of profile hidden Markov models (HMMs).

*Remarks:*

Instead of user PFM the TFBS characteristics can be uploaded as multiple sequence alignment from which MAPPER2 creates an HMM.

## **EELweb**

*URL:*

[http://tkt\\_bsap.staff.cs.helsinki.fi/EELweb/](http://tkt_bsap.staff.cs.helsinki.fi/EELweb/)

*Description from the web page:*

Enhancer Element Locator, or EEL, is a tool for locating distal gene enhancer elements in mammalian genomes by comparative genomics.

## Target Explorer

*URL:*

[http://luna.bioc.columbia.edu/Target\\_Explorer/](http://luna.bioc.columbia.edu/Target_Explorer/)

*Description from the web page:*

Target Explorer automates the entire process from the creation of a customized library of binding sites for known transcription factors through the prediction and annotation of putative target genes that are potentially regulated by these factors.

*Remarks:*

The service is restricted to Drosophila, although any sequence and PFM can be uploaded. A PFM upload requires registration.

## MotifViz

*URL:*

<http://biowulf.bu.edu/MotifViz/>

*Description from the web page:*

Motif Search and Visualization.

*Remarks:*

Allows to choose between four different motif scanners. Although the upload of multiple sequences is allowed, the sequences are treated as unrelated independent instances.

## TOUCAN 2

*URL:*

<http://homes.esat.kuleuven.be/~saerts/software/toucan.php>

*Description from the web page:*

TOUCAN is a workbench for regulatory sequence analysis on metazoan genomes : comparative genomics, detection of significant transcription factor binding sites, and detection of cis-regulatory modules (combinations of binding sites) in sets of coexpressed/coregulated genes.

*Remarks:*

Comprehensive tool which integrates many different primary tools from the web.
